# Supplementary material
Source: PubMed Central journal article supplement (PMC5818818)
Supplement: jama-318-1150-s001.pdf [file jama-318-1150-s001.pdf]

## Supplementary Online Content

LI D, Radulescu A, Shrestha RT, et al. Association of biotin ingestion with performance of hormone and nonhormone assays in healthy adults. *JAMA*. doi:10.1001/jama.2017.13705

**eFigure 1.** Principle of the Roche cobas e602 sandwich immunoassay for measurement of TSH in a blood sample (A and B) and effect of excess biotin in a blood sample (C)

**eFigure 2.** Principle of the Roche cobas e602 competitive immunoassay for measurement of total T4 in a blood sample (A and B) and effect of excess biotin in a blood sample (C)

**eFigure 3.** Concentrations of ferritin (A-D), NT-proBNP (E-H), 25-OHD (I-L), PSA (M-N) at baseline without biotin, day 7 with biotin and day 14 without biotin

**eTable 1.** Summary of the 37 assays evaluated in the study

**eTable 2.** Assay imprecisions

**eTable 3.** Concentrations of NT-proBNP, 25-OHD, ferritin and PSA across the study systems at baseline without biotin, day 7 with biotin and day 14 without biotin

**eTable 4.** Analyte mean individual comparisons over time between baseline without biotin, day 7 with biotin and day 14 without biotin

This supplementary material has been provided by the authors to give readers

**A. Formation of biotinylated TSH immunocomplex**

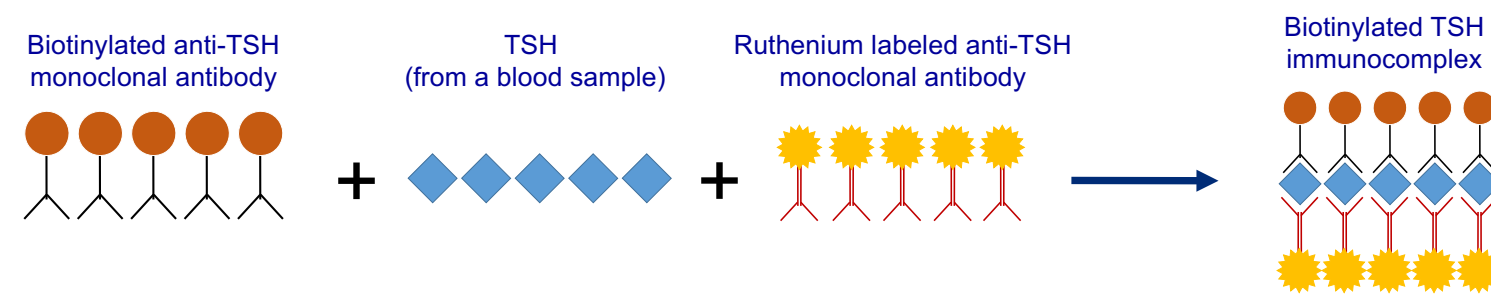

**B. Separation of biotinylated TSH immunocomplex using streptavidin-coated magnetic beads without excess biotin present in a blood sample**

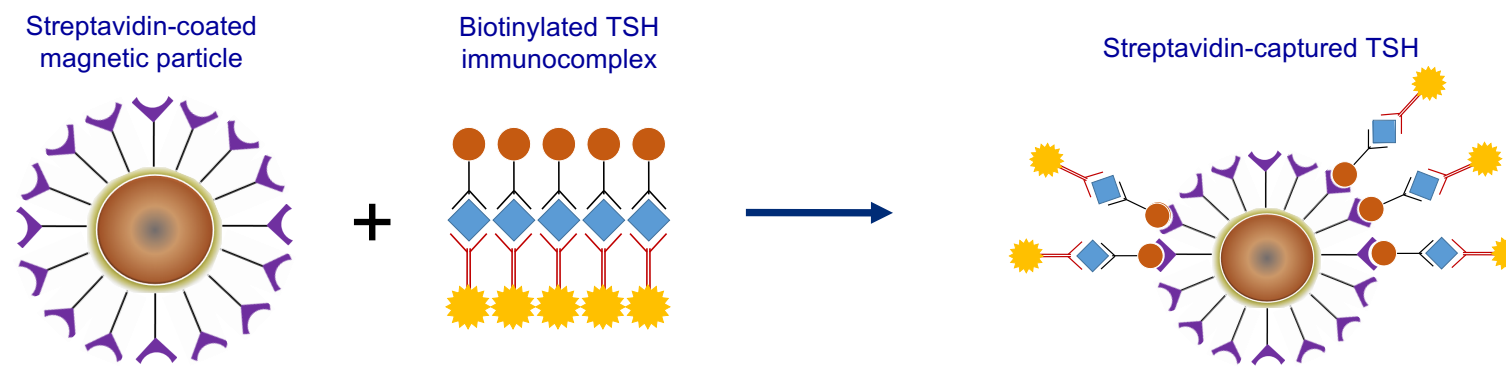

**C. Mechanism of interference when excessive biotin is present in a blood sample that results in decreased streptavidin-capture TSH, which produces a falsely low TSH result in a TSH sandwich immunoassay**

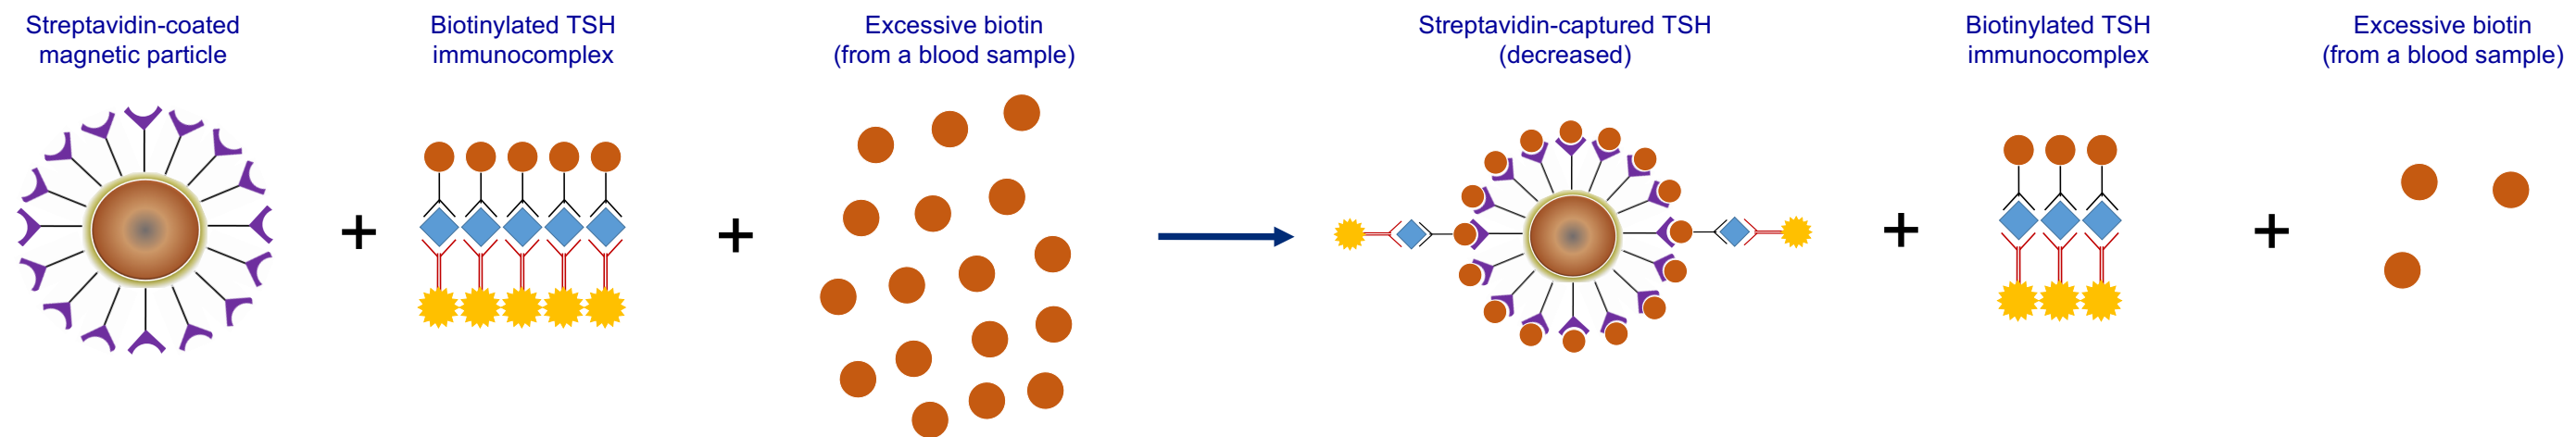

**Supplement eFigure 1. Principle of the Roche cobas e602 sandwich immunoassay for measurement of TSH in a blood sample (A and B) and effect of excess biotin in a blood sample (C).**

(A). Biotinylated anti-TSH monoclonal antibody and a ruthenium labeled anti-TSH monoclonal antibody form a sandwich immunocomplex with the TSH from a blood sample;

(B). Streptavidin-coated micro-particles are added to magnetically separate, or capture, via biotin and streptavidin interaction, the biotinylated TSH immunocomplex. The amount of streptavidin-captured TSH is directly proportional to the TSH present in the blood sample;

(C). When a blood sample contains excessive biotin, biotin competes with the biotinylated TSH immunocomplex for binding to the streptavidin-coated magnetic particles, resulting in reduced capture of the biotinylated TSH immunocomplex. Since the amount of streptavidin-captured TSH is directly proportional to the TSH present in the blood sample, the excess blood biotin produces a falsely low result for TSH.

**A. Formation of T4 immuno-ruthenium complex**

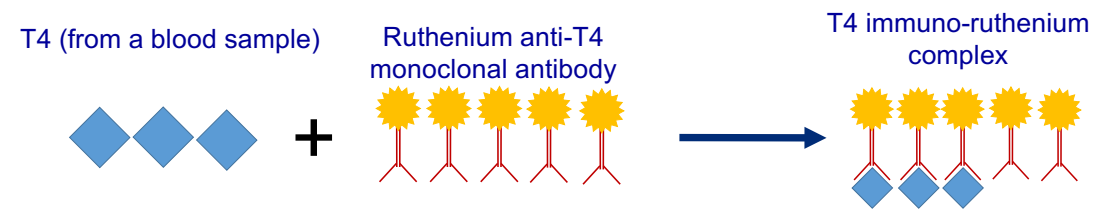

**B. Separation of biotinylated complex using streptavidin coated beads without excess biotin present in a blood sample**

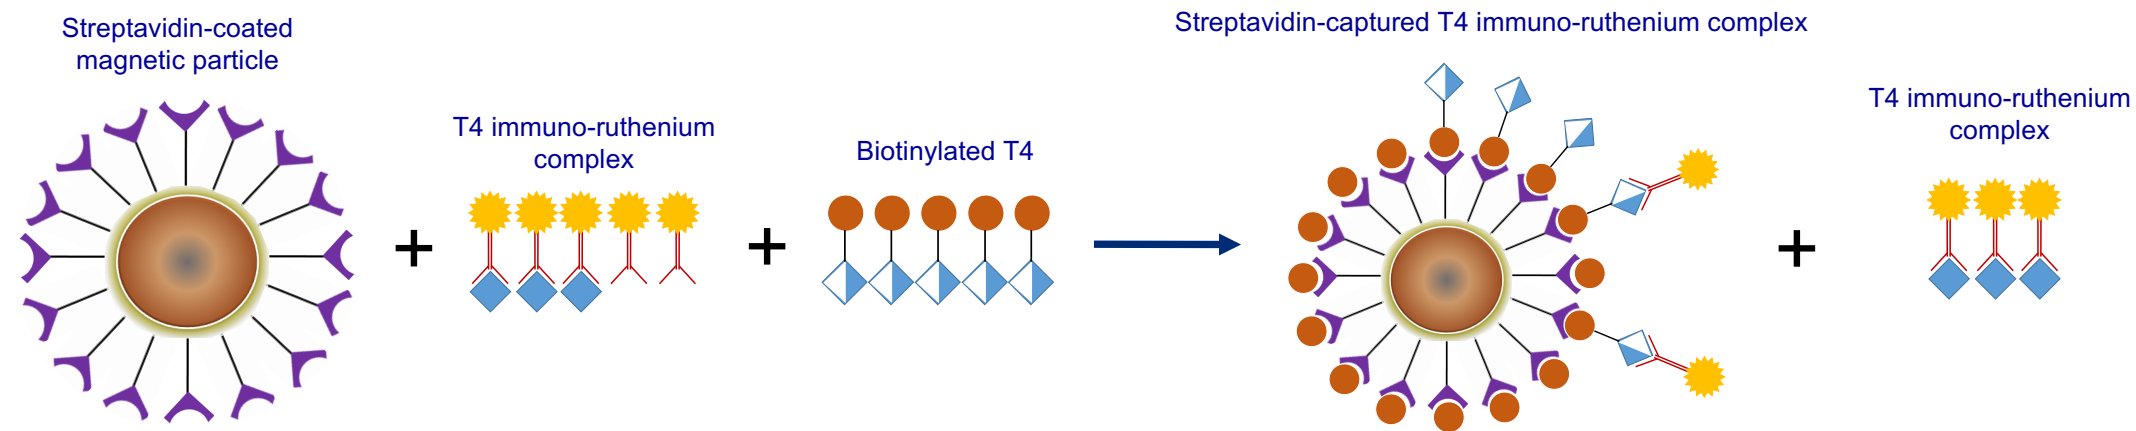

**C. Mechanism of Interference when excessive biotin is present in a blood sample that results in decreased streptavidin-capture T4, which produces a falsely high T4 result in a T4 competitive immunoassay**

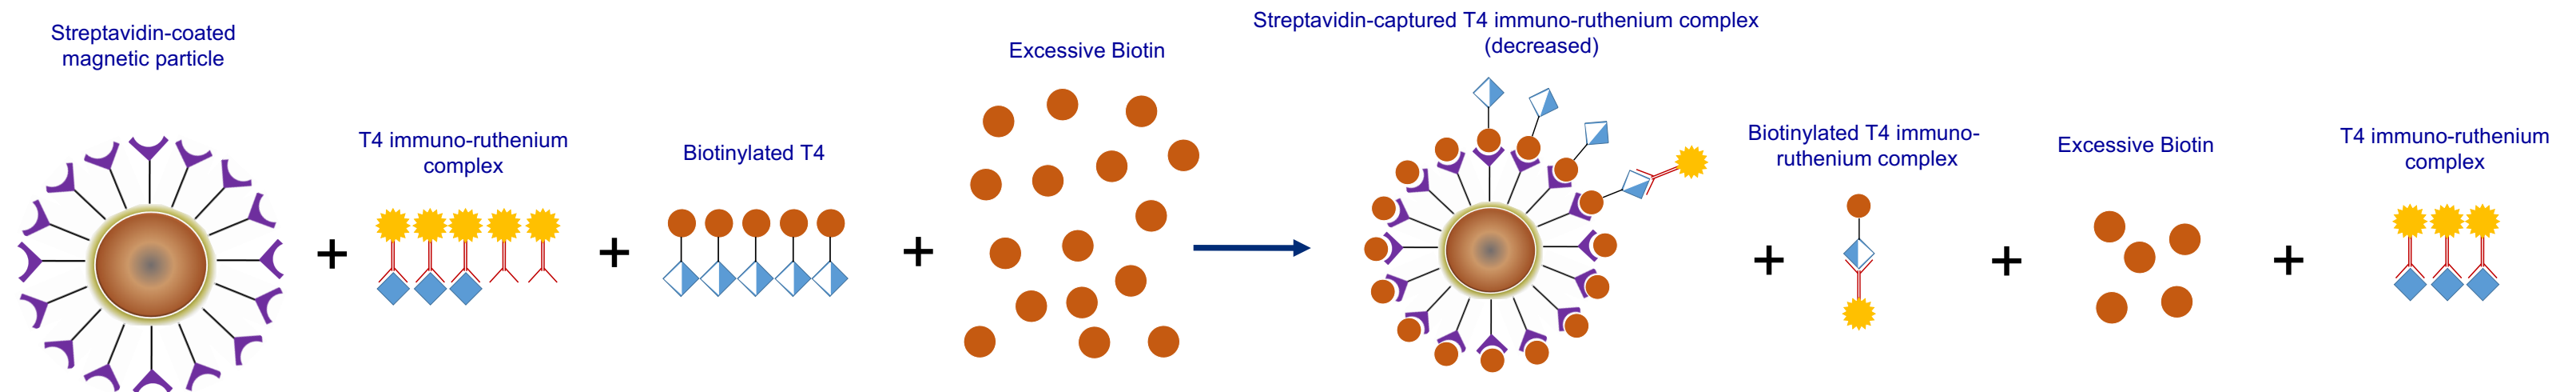

**Supplement eFigure 2. Principle of the Roche cobas e602 competitive immunoassay for Total T4 in a blood sample (A and B) and effect of excess biotin in a blood sample (C).**

(A). Total T4, released from binding proteins, forms a T4 immuno-ruthenium complex with ruthenium labeled anti-T4 monoclonal antibody;

(B). Streptavidin-coated magnetic particles and a fixed amount of biotinylated T4 are then added; T4 from the blood sample competes with the added biotinylated T4 for binding the unoccupied ruthenium anti-T4 monoclonal antibody. Biotinylated T4 complexes (both ruthenium bound and unbound), are captured on the streptavidin-coated magnetic particles. Streptavidin-captured T4 immuno-ruthenium complexes have an inverse relationship to T4 from the blood sample;

(C). Excessive biotin competes with biotinylated T4 for binding to the streptavidin-coated magnetic beads, and therefore decreases streptavidin captured T4 immuno-ruthenium complex. Because of the negative relationship between streptavidin-captured T4 immuno-ruthenium complex and the competitive assay's ruthenium signal readout, excessive biotin in a blood sample produces a falsely increased T4 result for the blood sample.

**(A) Architect**  
(Non-biotinylated, Sandwich Assay)

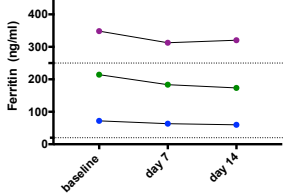

**(B) Cobas**  
(Biotinylated, Sandwich Assay)

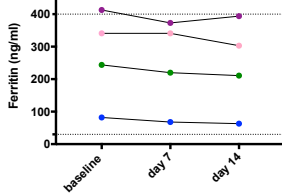

**(C) Vista**  
(Biotinylated, Sandwich Assay)

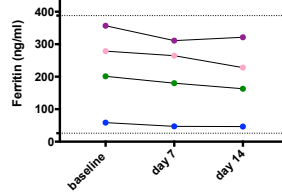

**(D) Vitros**  
(Biotinylated, Sandwich Assay)

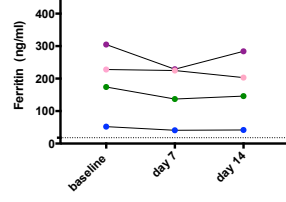

**(E) Cobas**  
(Biotinylated, Sandwich Assay)

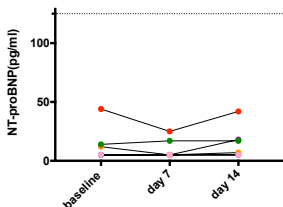

**(F) Vitros**  
(Biotinylated, Sandwich Assay)

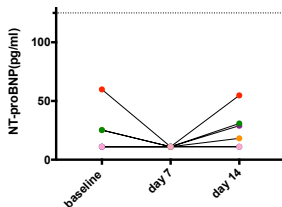

**(G) Vista**  
(Biotinylated, Sandwich Assay)

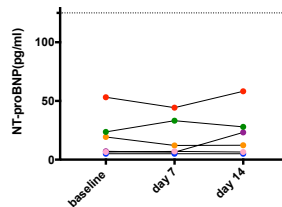

**(H) Architect**  
(Biotinylated, Competitive Assay)

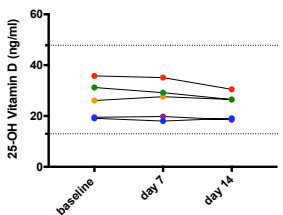

**(I) Cobas**  
(Biotinylated, Competitive Assay)

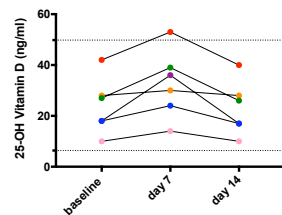

**(J) Architect**  
(Non-biotinylated, Sandwich Assay)

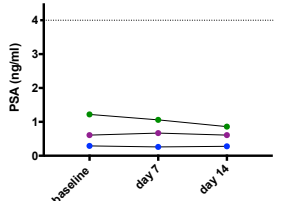

**(K) Vista**  
(Biotinylated, Sandwich Assay)

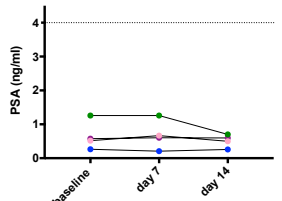

**Supplement eFigure 3. Concentrations of ferritin (A-D), NT-proBNP (E-G), 25-OHD (H-I), PSA (J-K) in the 6 study participants at baseline, day 7 on biotin and day 14 off biotin.**

Ferritin was measured on Abbott Architect 2000 (A), Roche cobas e602 (B), Siemens Vista Dimension 1500 (C), and OCD Vitros 5600 (D); NT-proBNP on Roche cobas e602 (E), OCD Vitros 5600 (F), and Siemens Vista Dimension 1500 (G); 25-OH Vitamin D on Abbott Architect 2000 (H), Roche cobas e602 (I); and PSA on Abbott Architect 2000 (J) and Siemens Vista Dimension 1500 (K). All tests were performed on 6 participants with the following two exceptions: (i) PSA and ferritin were performed on 4 men, except n= 3 on the Abbott Architect; and (ii) Architect 25-OHD was performed on 5 participants. Dotted lines represent the lower and the upper reference range for the assay. Reference range is not shown for NT-proBNP, which does not have lower reference and where the diagnosis of congestive heart failure may be defined by levels > 125 pg/mL in individuals < age 75. Biotin ingestion of 10 mg/day for 7 days was associated with significantly decreased OCD Vitros NT-proBNP results ( $p=.03$ ) and significantly increased Roche cobas e602 25-OHD results ( $p<.001$ ). A unique color is used for each participant across all panels.

Abbreviations: NT-proBNP = N-terminal pro brain natriuretic peptide; 25-OHD= 25 hydroxyvitamin D; PSA= prostate specific antigen; CI = confidence intervals.

**Supplement eTable 1. Summary of the 37 assays evaluated in the study.**

| <b>Immuno-assay Principle</b> | <b>Analyte</b>    | <b>Manufacturer/ Analyzer</b> | <b>Testing location</b> | <b>Biotin used in the assay?</b> | <b>Predicted direction of biotin interference</b> | <b>Reference Range</b>                          |
|-------------------------------|-------------------|-------------------------------|-------------------------|----------------------------------|---------------------------------------------------|-------------------------------------------------|
| Sandwich                      | <b>TSH</b>        | Roche Cobas e602              | JHMI                    | yes                              | Falsely Low                                       | 0.27-4.20 mIU/L                                 |
|                               |                   | OCD Vitros 5600               | CMH                     | yes                              |                                                   | 0.47-4.68 mIU/L                                 |
|                               |                   | Siemens Vista Dimension 1500  | UMMC                    | yes                              |                                                   | 0.36—3.74 mIU/L                                 |
|                               |                   | Abbott Architect              | BMC                     | No                               | Not affected                                      | 0.35-4.94 mIU/L                                 |
|                               | <b>Intact PTH</b> | Roche Cobas e602              | JHMI                    | Yes                              | Falsely Low                                       | 15-65 pg/mL                                     |
|                               |                   | OCD Vitros 5600               | CMH                     | Yes                              |                                                   | 7.5-53.5 pg/mL                                  |
|                               |                   | Siemens Advia Centaur XP      | UMMC                    | Yes                              |                                                   | 14-72 pg/mL                                     |
|                               |                   | Abbott Architect              | BMC                     | No                               | Not affected                                      | 8.5-72.5 pg/mL                                  |
|                               | <b>Prolactin</b>  | Roche Cobas e602              | JHMI                    | Yes                              | Falsely Low                                       | Female 4.79-23.3 ng/mL<br>Male: 4.04-15.2 ng/mL |
|                               |                   | Siemens Immulite 2000         | CMH                     | No                               | Not affected                                      | Female 1.9-25 ng/mL<br>Male: 2.5-17 ng/mL       |
|                               |                   | Siemens Vista Dimension 1500  | UMMC                    | Yes                              | Falsely Low                                       | Female 2.2-30.3 ng/mL<br>Male: 2.5-17.4 ng/mL   |
|                               |                   | Abbott Architect              | BMC                     | No                               | Not affected                                      | Female 5.18-26.5 ng/mL<br>Male: 3.46-19.4 ng/mL |
|                               | <b>NT-proBNP</b>  | Roche Cobas e602              | JHMI                    | yes                              | Falsely Low                                       | < 125 pg/mL                                     |
|                               |                   | OCD Vitros                    | CMH                     | yes                              | Falsely Low                                       | < 125 pg/mL                                     |
|                               |                   | Siemens Vista Dimension 1500  | UMMC                    | yes                              | Falsely Low                                       | < 125 pg/mL                                     |
|                               | <b>PSA</b>        | Siemens Dimension Vista       | UMMC                    | Yes                              | Falsely Low                                       | < 4 ng/mL                                       |
|                               |                   | Abbott Architect              | BMC                     | No                               | Not affected                                      | < 4 ng/mL                                       |
|                               | <b>Ferritin</b>   | Roche Cobas e602              | JHMI                    | Yes                              | Falsely Low                                       | Male: 30-400 ng/mL                              |
|                               |                   | OCD Vitros                    | CMH                     | Yes                              | Falsely Low                                       | Male: 17.9-464 ng/mL                            |
| Siemens Vista Dimension       |                   | UMMC                          | Yes                     | Falsely Low                      | Male: 26-388 ng/mL                                |                                                 |
| Sandwich*                     |                   | Abbott Architect Quantia      | BMC                     | No                               | Not affected                                      | Male: 20-250 ng/mL                              |

**Supplement eTable 1. Summary of the 37 assays evaluated in the study (Continued).**

| <b>Immuno-assay Principle</b> | <b>Analyte</b>   | <b>Manufacturer/ Analyzer</b> | <b>Testing location</b> | <b>Biotin used in the assay?</b> | <b>Predicted direction of biotin interference</b> | <b>Reference Range</b> |
|-------------------------------|------------------|-------------------------------|-------------------------|----------------------------------|---------------------------------------------------|------------------------|
| Competitive                   | <b>Total T4</b>  | Roche Cobas e602              | JHMI                    | Yes                              | Falsely High                                      | 4.5-11.7 mcg/dL        |
|                               |                  | OCD Vitros 5600               | CMH                     | No                               | Not affected                                      | 5.53-11 mcg/dL         |
|                               |                  | Siemens Vista Dimension 1500  | UMMC                    | No                               |                                                   | 4.5-13.9 mcg/dL        |
|                               |                  | Abbott Architect              | BMC                     | No                               |                                                   | 4.87-11.7 mcg/dL       |
|                               | <b>Total T3</b>  | Roche Cobas e602              | JHMI                    | Yes                              |                                                   | Falsely High           |
|                               |                  | OCD Vitros 5600               | CMH                     | No                               | Not affected                                      | 0.97-1.7 ng/mL         |
|                               |                  | Siemens Advia Centaur XP      | UMMC                    | No                               |                                                   | 0.6-1.8 ng/mL          |
|                               |                  | Abbott Architect              | BMC                     | No                               |                                                   | 0.58-1.6 ng/mL         |
|                               | <b>Free T4</b>   | Roche Cobas e602              | JHMI                    | Yes                              |                                                   | Falsely High           |
|                               |                  | OCD Vitros 5600               | CMH                     | No                               | Not affected                                      | 0.78-2.2 ng/dL         |
|                               |                  | Siemens Vista Dimension 1500  | UMMC                    | Yes                              | Falsely High                                      | 0.76-1.5 ng/dL         |
|                               |                  | Abbott Architect              | BMC                     | No                               | Not affected                                      | 0.70-1.5 ng/dL         |
|                               | <b>Free T3</b>   | Roche Cobas e602              | JHMI                    | Yes                              | Falsely High                                      | 2.0-4.4 pg/mL          |
|                               |                  | Siemens Vista Dimension 1500  | UMMC                    | Yes                              |                                                   | 2.2-4.0 pg/mL          |
| <b>25-OHD</b>                 | Roche Cobas e602 | JHMI                          | Yes                     | Falsely High                     | 6.36-49.5 ng/mL                                   |                        |
|                               | Abbott Architect | BMC                           | Yes                     | Falsely high                     | 13.0-47.8 ng/mL                                   |                        |

Assays evaluated in the study are indicated by immunoassay format, type of analyte measured, manufacturer/analyzer, testing location, reference range as defined on the manufacturer's package insert for the assay, whether or not the assay has biotinylated components and the predicated effect and direction of biotin interference.

Abbreviations: TSH =thyroid stimulating hormone; PTH = parathyroid hormone; NT-ProBNP= N-terminal pro-brain natriuretic peptide; PSA=prostate specific antigen; total T4 = total thyroxine; Total T3 = total triiodothyronine; Free T4 = free thyroxine; Free T3= free triiodothyronine; 25-OHD= 25 hydroxyvitamin D, JHMI = Johns Hopkins Medical Institutions; CMH= Children's Mercy Hospital; UMMC= University of Minnesota Medical Center; BMC= Boston Medical Center.

\*Abbott Architect Quantia used a polyclonal antibody immuno-agglutination method.

To convert PTH pg/ml to ng/L, multiply by 1.

To convert prolactin ng/ml to pM, multiply by 43.478.

To convert NT-proBNP pg/ml to pM multiply by 0.118

To convert PSA ng/ml to mcg/L, multiply by 1

To convert ferritin ng/ml to pM, multiply by 2.247

To convert Total T4 mcg/dl to nM, multiply by

12.871. To convert Total T3 ng/ml to nM, multiply by

1.54. To convert Free T4 ng/dl to pM, multiply by

12.871. To convert Free T3 pg/ml to pM, multiply by

1.54. To convert 25-OHD ng/ml to nM, multiply by

2.496



**Supplement eTable 2. Assay Imprecisions.**

| <b>Testing Site</b>   | <b>Assay</b>     | <b>Analyte</b>   | <b>QC Level (Unit)</b> | <b>SD</b> | <b>%CV</b> |
|-----------------------|------------------|------------------|------------------------|-----------|------------|
| JHMI                  | Roche cobas e602 | <b>TSH</b>       | 0.85 µIU/mL            | 0.02      | 1.86       |
|                       |                  | <b>Total T4</b>  | 8.86 µg/dL             | 0.32      | 3.6        |
|                       |                  | <b>Free T4</b>   | 1.49 ng/dL             | 0.04      | 2.93       |
|                       |                  | <b>Total T3</b>  | 1.28 ng/mL             | 0.05      | 3.63       |
|                       |                  | <b>Free T3</b>   | 2.89 ng/dL             | 0.1       | 3.57       |
|                       |                  | <b>PTH</b>       | 19.33 pg/mL            | 1.37      | 7.11       |
|                       |                  | <b>Prolactin</b> | 10.3 ng/mL             | 0.32      | 3.07       |
|                       |                  | <b>NT-proBNP</b> | 113.18 pg/mL           | 4.44      | 3.92       |
|                       |                  | <b>25-OHD</b>    | 17.71 ng/mL            | 1.19      | 6.74       |
|                       |                  | <b>Ferritin</b>  | 32.1 ng/mL             | 0.87      | 2.7        |
| CMH                   | OCD Vitros 5600  | <b>TSH</b>       | 0.64 mIU/L             | 0.03      | 4.75       |
|                       |                  | <b>Total T4</b>  | 9.09 µg/dL             | 0.40      | 4.4        |
|                       |                  | <b>Free T4</b>   | 1.720 ng/dL            | 0.13      | 7.76       |
|                       |                  | <b>Total T3</b>  | 1.444 ng/mL            | 0.05      | 3.52       |
|                       |                  | <b>PTH</b>       | 19.66 pg/mL            | 1.85      | 9.43       |
|                       |                  | <b>NT-proBNP</b> | 144.37 pg/mL           | 6.28      | 4.35       |
|                       | OCD Vitros 5600  | <b>Ferritin</b>  | 21.90 ng/mL            | 1.32      | 6.0        |
| Siemens Immulite 2000 | <b>Prolactin</b> | 7.04 ng/mL       | 0.80                   | 5.37      |            |
| BMC                   | Abbott Architect | <b>TSH</b>       | 4.3 µIU/mL             | 0.3       | 6.98       |
|                       |                  | <b>Total T4</b>  | 8.3 µg/dL              | 0.5       | 6.0        |
|                       |                  | <b>Free T4</b>   | 1.15 ng/dL             | 0.06      | 5.22       |
|                       |                  | <b>Total T3</b>  | 93 ng/dL               | 5.5       | 5.91       |
|                       |                  | <b>PTH</b>       | 26 pg/mL               | 1         | 3.85       |
|                       |                  | <b>Prolactin</b> | 18 ng/mL               | 1.5       | 8.33       |
|                       |                  | <b>PSA</b>       | 0.28 ng/mL             | 0.04      | 14.29      |
|                       |                  | <b>25-OHD</b>    | 29.9 ng/mL             | 2.9       | 9.70       |
|                       |                  | <b>Ferritin</b>  | 121 ng/mL              | 10        | 8.3        |

**Supplement eTable 2. Assay Imprecisions (Continued).**

| <b>Testing Site</b> | <b>Assay</b>                 | <b>Analyte</b>   | <b>QC Level (Unit)</b> | <b>SD</b> | <b>%CV</b> |
|---------------------|------------------------------|------------------|------------------------|-----------|------------|
| UMMC                | Siemens Vista Dimension 1500 | <b>TSH</b>       | 0.674 mIU/L            | 0.02      | 2.63       |
|                     |                              | <b>Total T4</b>  | 10.72 µg/dL            | 0.67      | 6.3        |
|                     |                              | <b>Free T4</b>   | 1.365 ng/dL            | 0.02      | 1.76       |
|                     |                              | <b>Free T3</b>   | 2.06 pg/mL             | 0.10      | 4.80       |
|                     |                              | <b>Prolactin</b> | 6.67 ng/mL             | 0.17      | 2.52       |
|                     |                              | <b>PSA</b>       | 0.0289 µg/L            | 0.01      | 3.04       |
|                     |                              | <b>NT-proBNP</b> | 108.52 pg/mL           | 2.83      | 2.61       |
|                     |                              | <b>Ferritin</b>  | 23.58                  | 0.66      | 2.8        |
|                     | Siemens Advia Centaur XP     | <b>PTH</b>       | 366.19 pg/mL           | 37.19     | 5.96       |
|                     | Siemens Advia Centaur XP     | <b>Total T3</b>  | 106.19 ng/dL           | 11.73     | 5.94       |

Imprecision data are shown for assay systems and individual analytes including the quality control analyte concentration at which the precision analysis was performed (QC level), SD (standard deviation), and percent intra-assay coefficient of variation (%CV).

Abbreviations: TSH =thyroid stimulating hormone; PTH = parathyroid hormone; NT-proBNP= N-terminal pro-brain natriuretic peptide; PSA=prostate specific antigen; Total T4 = total thyroxine; Total T3 = total triiodothyronine; Free T4 = Free thyroxine; Free T3 = Free triiodothyronine; 25-OHD= 25 hydroxyvitamin D, JHMI = Johns Hopkins Medical Institutions; CMH= Children’s Mercy Hospital; UMMC= University of Minnesota Medical Center; BMC= Boston Medical Center.

**Supplement eTable 3. Concentrations of NT-proBNP, 25-OHD, ferritin, and PSA across the study systems at baseline without biotin, day 7 with biotin and day 14 without biotin.**

| <b>System</b>    | <b>Time</b>             | <b>Mean of analyte concentrations (95% CI)</b> | <b>Mean of day 7 differences from the mean of baseline and day 14 (95% CI)</b> | <b>Day 7 difference p-value</b> | <b>Mean of analyte concentrations (95% CI)</b> | <b>Mean of day 7 differences from the mean of baseline and day 14 (95% CI)</b> | <b>Day 7 difference p-value</b> |
|------------------|-------------------------|------------------------------------------------|--------------------------------------------------------------------------------|---------------------------------|------------------------------------------------|--------------------------------------------------------------------------------|---------------------------------|
|                  |                         | <b>NT-proBNP<br/>pg/mL</b>                     | <b>pg/mL</b>                                                                   |                                 | <b>Ferritin<br/>ng/mL</b>                      | <b>ng/mL</b>                                                                   |                                 |
| <b>Cobas</b>     | <b>Baseline without</b> | 13.7 (-2.6; 30)                                | -3.67 (-8.06; 0.72)                                                            | .13                             | 270 (42; 498)                                  | -5.9 (-21; 9.3)                                                                | .48                             |
|                  | <b>Day 7 with</b>       | 9.7 (0.1; 19)                                  |                                                                                |                                 | 251 (30; 471)                                  |                                                                                |                                 |
|                  | <b>Day 14 without</b>   | 13.0 (-2.8; 29)                                |                                                                                |                                 | 243 (18; 467)                                  |                                                                                |                                 |
| <b>Vista</b>     | <b>Baseline without</b> | 19.0 (-0.5; 38)                                | -2.66 (-8.07; 2.75)                                                            | .36                             | 224 (22; 426)                                  | -6.0 (-21; 8.9)                                                                | .46                             |
|                  | <b>Day 7 with</b>       | 17.8 (0.2; 35)                                 |                                                                                |                                 | 201 (16; 385)                                  |                                                                                |                                 |
|                  | <b>Day 14 without</b>   | 22.0 (1.0; 43)                                 |                                                                                |                                 | 190 (5.7; 374)                                 |                                                                                |                                 |
| <b>Vitros</b>    | <b>Baseline without</b> | 23.9 (4.0;44)                                  | -13.9 (-24.7; -3.12)                                                           | .03                             | 190 (20; 359)                                  | -21 (-44; 1.9)                                                                 | .12                             |
|                  | <b>Day 7 with</b>       | < 11.1 (11;11)                                 |                                                                                |                                 | 158 (17; 299)                                  |                                                                                |                                 |
|                  | <b>Day 14 without</b>   | 25.8 (8.4;43)                                  |                                                                                |                                 | 169 (6.9; 331)                                 |                                                                                |                                 |
| <b>Architect</b> | <b>Baseline without</b> |                                                |                                                                                |                                 | 212 (-131; 555)                                | -12 (6.35)                                                                     | .14                             |
|                  | <b>Day 7 with</b>       |                                                |                                                                                |                                 | 186 (-123; 496)                                |                                                                                |                                 |
|                  | <b>Day 14 without</b>   |                                                |                                                                                |                                 | 185 (-140; 509)                                |                                                                                |                                 |
|                  |                         | <b>25-OHD<br/>ng/mL</b>                        | <b>ng/mL</b>                                                                   |                                 | <b>PSA<br/>ng/mL</b>                           |                                                                                |                                 |
| <b>Cobas</b>     | <b>Baseline without</b> | 23.8 (12; 35)                                  | 9.25 (5.72; 12.8)                                                              | < .001                          |                                                |                                                                                |                                 |
|                  | <b>Day 7 with</b>       | 32.7 (19; 47)                                  |                                                                                |                                 |                                                |                                                                                |                                 |
|                  | <b>14 without</b>       | 23.0 (12; 34)                                  |                                                                                |                                 |                                                |                                                                                |                                 |
| <b>Architect</b> | <b>Baseline without</b> | 26.3 (17; 35)                                  | 0.66 (-0.95; 2.27)                                                             | .44                             | 0.71 (-0.5; 1.9)                               | 0.02 (-0.12; 0.16)                                                             | .82                             |
|                  | <b>Day 7 with</b>       | 25.9 (17; 35)                                  |                                                                                |                                 | 0.66 (-0.3; 1.7)                               |                                                                                |                                 |
|                  | <b>Day 14 without</b>   | 24.2 (18; 31)                                  |                                                                                |                                 | 0.58 (-0.1; 1.3)                               |                                                                                |                                 |
| <b>Vista</b>     | <b>Baseline without</b> |                                                |                                                                                |                                 | 0.65 (-0.02;1.3)                               | 0.1 (-0.10; 0.30)                                                              | .36                             |
|                  | <b>Day 7 with</b>       |                                                |                                                                                |                                 | 0.68 (-0.01; 1.4)                              |                                                                                |                                 |
|                  | <b>Day 14 without</b>   |                                                |                                                                                |                                 | 0.51 (0.2; 0.8)                                |                                                                                |                                 |

Analyte concentrations are expressed in columns 3 (NT-proBNP and 25-OHD)) and 6 (ferritin, PSA) as mean (95% CI). Each analysis was a repeated measures ANOVA (mixed linear model) where the random effect was a participant and the within-participant fixed effect was time (day of

study). The primary comparison was day 7 (with biotin) versus the mean of days 0 and 14 (without biotin) using a contrast in the ANOVA, i.e., (day 7 - (1/2 (baseline [day 0] + day 14))). Columns 4 and 7 show the difference data, presented as the absolute mean difference from combined baseline (95% CI of the difference). The units for the day 7 difference are the same as those of analyte concentrations.

All the tests were performed on 6 participants with the following two exceptions: (i) PSA and ferritin were performed on 4 men, except n= 3 on the Abbott Architect; and (ii) Architect 25-OHD was performed on 5 participants.

To convert NT-proBNP pg/ml to pM multiply by 0.118

To convert PSA ng/ml to mcg/L, multiply by 1

To convert ferritin ng/ml to pM, multiply by 2.247

To convert 25-OHD ng/ml to nM, multiply by 2.496

Abbreviations: NT-ProBNP= N-terminal pro-brain natriuretic peptide; PSA=prostate specific antigen; 25-OH vitamin D= 25 hydroxyvitamin D; CI = confidence interval

Supplement eTable 4. Analyte mean individual comparisons over time between baseline without biotin, day 7 with biotin and day 14 without biotin.

| Test<br>(units for<br>the differenc<br>e result) | System           | Overall<br>time<br>effect<br>F-test<br>p-value | LS Mean<br>Difference<br>between<br>Day 7-0<br>(95% CI) | LS means<br>TUKEY<br>HSD<br>Individual<br>pairs<br>p-value<br>Day 0 vs 7 | LS Mean<br>Difference<br>between<br>Day 7-14<br>(95% CI) | LS means<br>TUKEY<br>HSD<br>Individual<br>pairs<br>p-value<br>Day 7 vs 14 | LS Mean<br>Difference<br>between<br>Day 0 -14<br>(95% CI) | LS means<br>TUKEY<br>HSD<br>Individual<br>pairs<br>p-value<br>Day 0 vs 14 |
|--------------------------------------------------|------------------|------------------------------------------------|---------------------------------------------------------|--------------------------------------------------------------------------|----------------------------------------------------------|---------------------------------------------------------------------------|-----------------------------------------------------------|---------------------------------------------------------------------------|
| <b>Biotin<br/>pg/mL</b>                          |                  | < .001                                         | 2826 (2457; 3197)                                       | <.001                                                                    | 2510 (2141; 2880)                                        | < .001                                                                    | -317 (-53; 686)                                           | .09                                                                       |
| <b>TSH<br/>mIU/mL</b>                            | <b>Cobas</b>     | .01                                            | -0.59 (-0.06; 1.2)                                      | .08                                                                      | -0.85 (0.19; 1.5)                                        | .01                                                                       | -0.26 (-0.40; 0.91)                                       | .55                                                                       |
|                                                  | <b>Vitros</b>    | < .001                                         | -1.5 (0.89; 2.2)                                        | <.001                                                                    | -1.8 (1.1; 2.5)                                          | <.001                                                                     | -0.25 (-0.42; 0.91)                                       | .58                                                                       |
|                                                  | <b>Vista</b>     | .62                                            | -0.03 (-0.58; 0.63)                                     | .99                                                                      | -0.20 (-0.40; 0.81)                                      | .64                                                                       | 0.18 (-0.43; 0.78)                                        | .71                                                                       |
|                                                  | <b>Architect</b> | .57                                            | 0.05 (-0.55; 0.65)                                      | .97                                                                      | -0.18 (-0.42; 0.78)                                      | .70                                                                       | 0.23 (-0.37; 0.83)                                        | .57                                                                       |
| <b>PTH<br/>(pg/mL)</b>                           | <b>Cobas</b>     | .34                                            | -5.2 (-3.9; 14)                                         | .31                                                                      | -2.5 (-6.6; 12)                                          | .74                                                                       | 2.7 (-6.4; 12)                                            | .71                                                                       |
|                                                  | <b>Vitros</b>    | <.001                                          | -27 (12; 42)                                            | .001                                                                     | -25 (10; 39)                                             | .002                                                                      | 2.4 (-12; 17)                                             | .89                                                                       |
|                                                  | <b>Centaur</b>   | .89                                            | 2.8 (-14; 19)                                           | .89                                                                      | 1.9 (-15; 18)                                            | .95                                                                       | -0.93 (-16; 17)                                           | .99                                                                       |
|                                                  | <b>Architect</b> | .69                                            | 2.5 (-9.3; 14)                                          | .83                                                                      | 3.8 (-8.1; 16)                                           | .67                                                                       | 1.2 (-11; 13)                                             | .96                                                                       |
| <b>Total T4<br/>(mcg/dL)</b>                     | <b>Cobas</b>     | .43                                            | 0.10 (-0.48; 0.68)                                      | .89                                                                      | 0.28 (-0.30; 0.86)                                       | .41                                                                       | 0.18 (-0.40; 0.76)                                        | .67                                                                       |
|                                                  | <b>Vitros</b>    | .68                                            | -0.04 (-0.58; 0.65)                                     | .99                                                                      | 0.15 (-0.46; 0.77)                                       | .78                                                                       | 0.19 (-0.43; 0.81)                                        | .68                                                                       |
|                                                  | <b>Vista</b>     | .25                                            | -0.24 (-0.42; 0.90)                                     | .59                                                                      | 0.19 (-0.47; 0.85)                                       | .72                                                                       | 0.43 (-0.23; 1.1)                                         | .22                                                                       |
|                                                  | <b>Architect</b> | .86                                            | -0.03 (-0.40; 0.45)                                     | .99                                                                      | 0.06 (-0.37; 0.48)                                       | .93                                                                       | 0.08 (-0.34; 0.51)                                        | .85                                                                       |
| <b>Total T3<br/>(ng/mL)</b>                      | <b>Cobas</b>     | .004                                           | 0.85 (0.26; 1.4)                                        | .007                                                                     | 0.86 (0.27; 1.4)                                         | .007                                                                      | 0.01 (-0.58; 0.60)                                        | 1.0                                                                       |
|                                                  | <b>Vitros</b>    | .23                                            | 0.04 (-0.03; 0.11)                                      | .31                                                                      | 0.04 (-0.03; 0.11)                                       | .28                                                                       | 0.002 (-0.07; 0.07)                                       | 1.0                                                                       |
|                                                  | <b>Centaur</b>   | .37                                            | 0.05 (-0.04; 0.14)                                      | .36                                                                      | 0.04 (-0.06; 0.13)                                       | .54                                                                       | -0.01 (-0.08; 0.10)                                       | .94                                                                       |
|                                                  | <b>Architect</b> | .39                                            | 3.7 (-4.7; 12)                                          | .48                                                                      | 3.9 (-4.5; 12)                                           | .44                                                                       | 0.22 (-8.2; 8.7)                                          | 1.0                                                                       |

Supplement eTable 4. Analyte mean individual comparisons over time between baseline without biotin, day 7 with biotin and day 14 without biotin

(Continued).

| Test (units for the difference result) | System    | Overall time effect F-test p-value | LS Mean Difference between Day 7-0 (95% CI) | LS means TUKEY HSD Individual pairs p-value Day 0 vs 7 | LS Mean Difference between Day 7-14 (95% CI) | LS means TUKEY HSD Individual pairs p-value Day 7 vs 14 | LS Mean Difference between Day 0 -14 (95% CI) | LS means TUKEY HSD Individual pairs p-value Day 0 vs 14 |
|----------------------------------------|-----------|------------------------------------|---------------------------------------------|--------------------------------------------------------|----------------------------------------------|---------------------------------------------------------|-----------------------------------------------|---------------------------------------------------------|
| Free T4 (ng/dL)                        | Cobas     | .03                                | 0.12 (-0.009; 0.24)                         | .07                                                    | 0.13 (0.007; 0.26)                           | .04                                                     | 0.02 (-0.11; 0.14)                            | .93                                                     |
|                                        | Vitros    | .40                                | 0.02 (-0.08; 0.12)                          | .85                                                    | 0.05 (-0.05; 0.15)                           | .38                                                     | 0.03 (-0.07; 0.13)                            | .68                                                     |
|                                        | Vista     | .39                                | 0.01 (-0.05; 0.08)                          | .89                                                    | 0.03 (-0.03; 0.10)                           | .37                                                     | 0.02 (-0.04; 0.09)                            | .63                                                     |
|                                        | Architect | .63                                | 0.02 (-0.05; 0.08)                          | .79                                                    | 0.02 (-0.04; 0.08)                           | .62                                                     | 0.007 (-0.06; 0.07)                           | .95                                                     |
| Free T3 (pg/mL)                        | Cobas     | .01                                | 0.35 (0.04; 0.66)                           | .03                                                    | 0.37 (0.06; 0.68)                            | .02                                                     | 0.02 (-0.29; 0.33)                            | .99                                                     |
|                                        | Vista     | .001                               | 0.76 (0.32; 1.2)                            | .002                                                   | 0.80 (0.35; 1.2)                             | .002                                                    | 0.03 (-0.42; 0.48)                            | 1.0                                                     |
| Prolactin (ng/mL)                      | Cobas     | .09                                | -0.43 (-2.1; 2.9)                           | .88                                                    | -2.1 (-0.36; 4.6)                            | .1                                                      | -1.7 (-0.8; 4.2)                              | .20                                                     |
|                                        | Vista     | .11                                | -0.42 (-1.6; 2.4)                           | .84                                                    | -1.7 (-0.33; 3.6)                            | .1                                                      | -1.2 (-0.75; 3.2)                             | .25                                                     |
|                                        | Immulite  | .12                                | -0.33 (-1.5; 2.2)                           | .88                                                    | -1.5 (-0.36; 3.3)                            | .12                                                     | -1.1 (-0.69; 3.0)                             | .25                                                     |
|                                        | Architect | .07                                | -0.55 (-1.4; 2.5)                           | .72                                                    | -1.8 (-0.12; 3.8)                            | .07                                                     | -1.3 (-0.67; 3.2)                             | .22                                                     |
| NT proBNP (pg/mL)                      | Cobas     | .30                                | -4.0 (-3.1; 11)                             | .31                                                    | -3.3 (-3.8; 10)                              | .44                                                     | 0.67 (-6.4; 7.8)                              | .96                                                     |
|                                        | Vista     | .43                                | -1.1 (-7.6; 9.9)                            | .93                                                    | -4.2 (-4.5; 13)                              | .42                                                     | -3.0 (-5.7; 12)                               | .62                                                     |
|                                        | Vitros    | .08                                | -13 (-4.4; 30)                              | .15                                                    | -15 (-2.5; 32)                               | .09                                                     | -1.9 (-15.4; 19.2)                            | .95                                                     |
| Ferritin (ng/mL)                       | Cobas     | .05                                | -20 (-8.0; 47)                              | .15                                                    | 7.8 (-20; 35)                                | .68                                                     | 27 (-0.2; 55)                                 | .05                                                     |
|                                        | Vitros    | .13                                | -32 (-9.7; 73)                              | .12                                                    | -11 (-31; 52)                                | .72                                                     | 21 (-20; 62)                                  | .33                                                     |
|                                        | Vista     | .02                                | -23 (-3.8; 50)                              | .09                                                    | 11 (-16; 38)                                 | .46                                                     | 34 (7.3; 61)                                  | .02                                                     |
|                                        | Architect | .04                                | -25 (-1.1; 51)                              | .06                                                    | 1.9 (-24; 28)                                | .96                                                     | 27 (0.8; 53)                                  | .05                                                     |

**Supplement eTable 4. Analyte mean individual comparisons over time between baseline without biotin, day 7 with biotin and day 14 without biotin**

(Continued).

| Test (units for the difference result) | System    | Overall time effect F-test p-value | LS Mean Difference between Day 7-0 (95% CI) | LS means TUKEY HSD Individual pairs p-value Day 0 vs 7 | LS Mean Difference between Day 7-14 (95% CI) | LS means TUKEY HSD Individual pairs p-value Day 7 vs 14 | LS Mean Difference between Day 0 -14 (95% CI) | LS means TUKEY HSD Individual pairs p-value Day 0 vs 14 |
|----------------------------------------|-----------|------------------------------------|---------------------------------------------|--------------------------------------------------------|----------------------------------------------|---------------------------------------------------------|-----------------------------------------------|---------------------------------------------------------|
| 25 OHD (ng/mL)                         | Cobas     | .002                               | 8.8 (3.1; 15)                               | .004                                                   | 9.7 (4.0; 15)                                | .002                                                    | 0.83 (-4.9; 6.5)                              | .92                                                     |
|                                        | Architect | .12                                | -0.40 (-2.3; 3.1)                           | .91                                                    | 1.7 (-0.99; 4.4)                             | .23                                                     | 2.1 (-0.59; 4.8)                              | .12                                                     |
| PSA (ng/mL)                            | Vista     | .36                                | 0.03 (-0.33; 0.38)                          | .96                                                    | 0.17 (-0.19; 0.53)                           | .37                                                     | 0.14 (-0.22; 0.50)                            | .49                                                     |
|                                        | Architect | .43                                | -0.04 (-0.26; 0.35)                         | .87                                                    | 0.08 (-0.23; 0.39)                           | .65                                                     | 0.12 (-0.18; 0.43)                            | .41                                                     |

Each analysis was a repeated measures ANOVA (mixed linear model) where the subject effect was a person and the within subject effect was time (day of study). The table shows comparisons of pairs of times using Tukey’s HSD post hoc test. Least Squares (LS) mean difference data are derived from subtracting LS mean day 7 - 0, day 7 – 14, or day 0 - 14. The units for each analyte difference are listed in column 1.

All tests were performed on 6 participants, except PSA and ferritin, which were performed on 4 men; n=4 for all ferritin and PSA assays except n=3 for Abbott Architect ferritin and PSA, while n for all other tests is 6 except Architect 25-OHD (n=5).

The numerator degrees of freedom (DF) is 2 for all tests. The denominator DF is 4 for Architect PSA and ferritin, 6 for the other male-only tests, and 8 for Architect 25-OHD. For all other tests the denominator DF is 10.

Abbreviations: TSH =thyroid stimulating hormone; PTH = parathyroid hormone; NT-proBNP= N-terminal pro-brain natriuretic peptide; PSA=prostate specific antigen; Total T4 = total thyroxine; Total T3 = total triiodothyronine; Free T4 = Free thyroxine; Free T3 = Free triiodothyronine; 25-OHD= 25 hydroxyvitamin D.

To convert PTH pg/ml to ng/L, multiply by 1.

To convert prolactin ng/ml to pM, multiply by 43.478.

To convert NT-proBNP pg/ml to pM multiply by 0.118

To convert PSA ng/ml to mcg/L, multiply by 1

To convert ferritin ng/ml to pM, multiply by 2.247

To convert Total T4 mcg/dl to nM, multiply by 12.871.

To convert Total T3 ng/ml to nM, multiply by 1.54. To

convert Free T4 ng/dl to pM, multiply by 12.871. To

convert Free T3 pg/ml to pM, multiply by 1.54. To

convert 25-OHD ng/ml to nM, multiply by 2.496
